# Supplementary material for: Size-controlled synthesis of Au nanorings on Pd ultrathin nanoplates as efficient catalysts for hydrogenation
Source: Royal Society of Chemistry journal article supplement (doi:10.1039/c7ce01350g), 2017-01-01
Supplement: c7ce01350g1.pdf [file c7ce01350g1.pdf]

## Supporting Information

### **Size-controlled synthesis of Au nanorings on Pd ultrathin nanoplates as efficient catalysts for hydrogenation**

Yu Han,<sup>§</sup> Wenxing Wang,<sup>§</sup> Penglin Jiang, Yucong Yan, Hui Zhang,\* Deren Yang

State Key Laboratory of Silicon Materials, School of Materials Science and Engineering,  
Zhejiang University, Hangzhou, Zhejiang 310027, P. R. China.

\*Correspondence to: msezhanghui@zju.edu.cn

<sup>§</sup>These two authors contribute equally to this work.

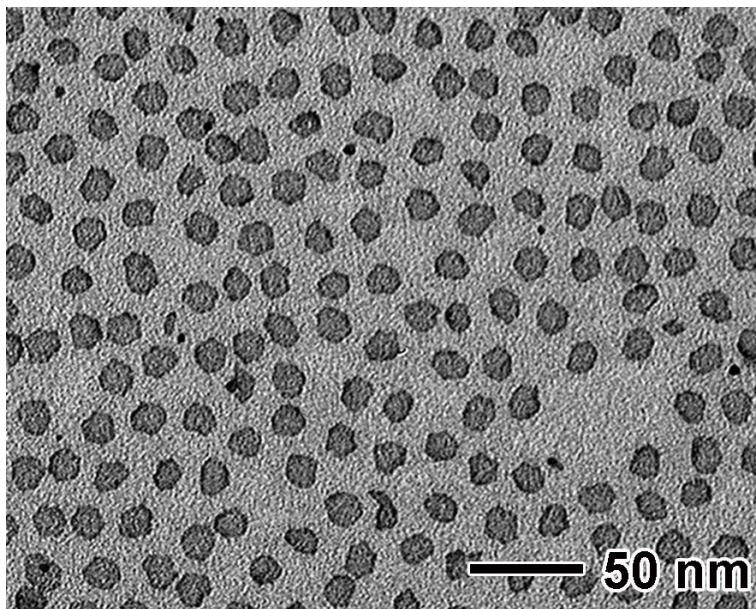

**Figure S1.** TEM image of Pd nanoplates with average edge length of 6 nm.

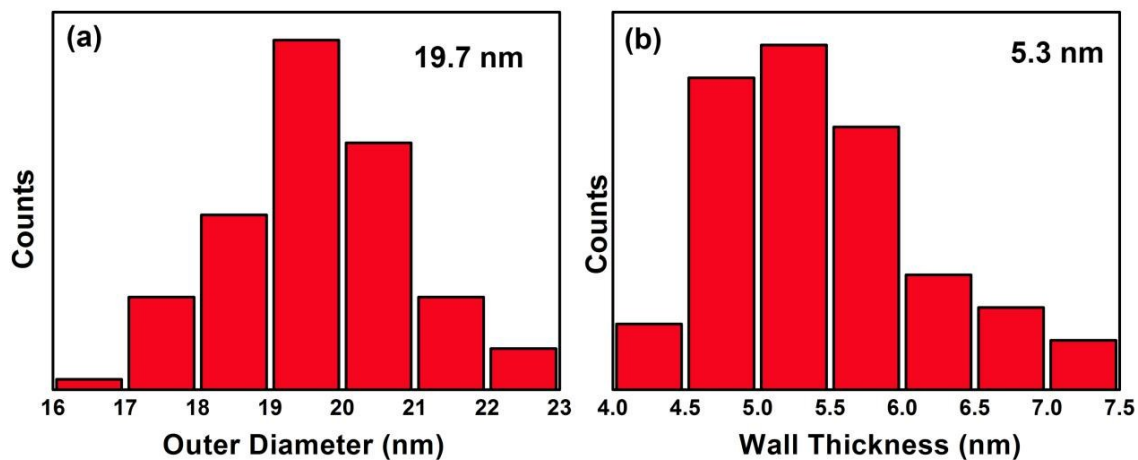

**Fig. S2** (a) The outer diameter and (b) wall thickness distribution of the Pd nanoplate supported Au nanorings prepared using the standard procedure.

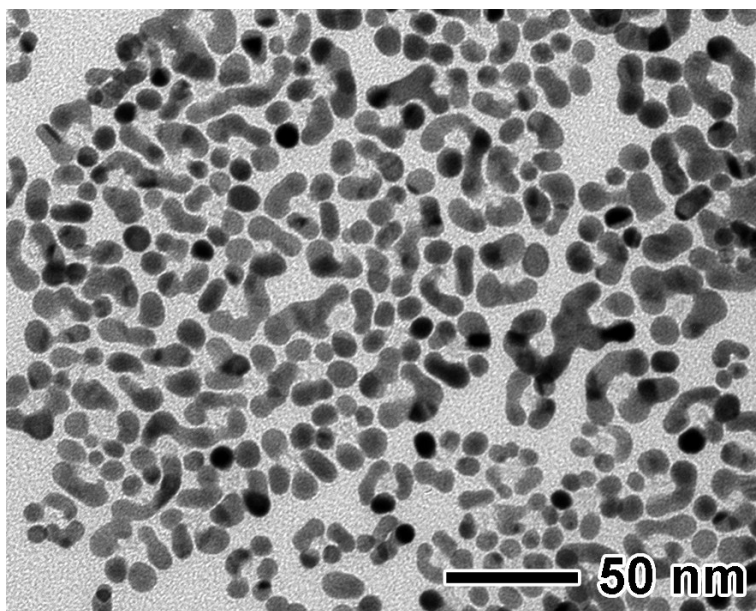

**Fig. S3** TEM image of the sample prepared using the standard procedure except for the absence of  $\text{Ag}^+$  ions.

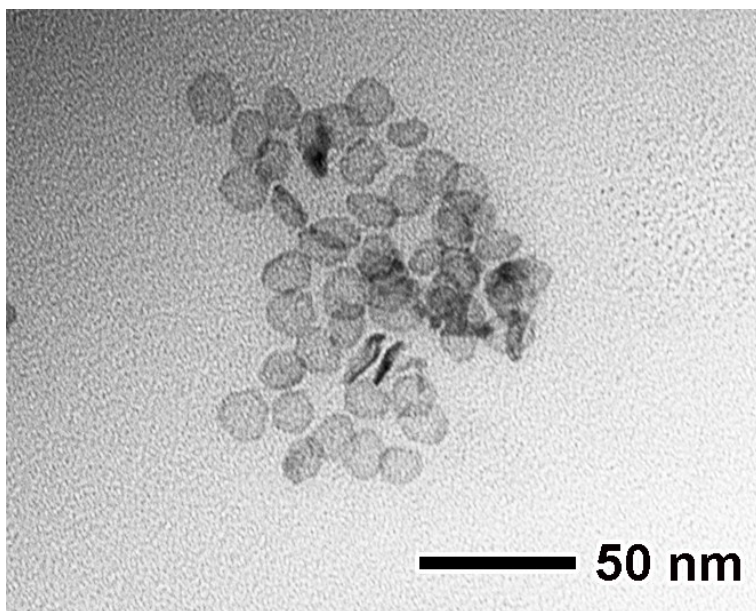

**Fig. S4** TEM image of the sample prepared using the standard procedure except for the absence of  $\text{HAuCl}_4$ .

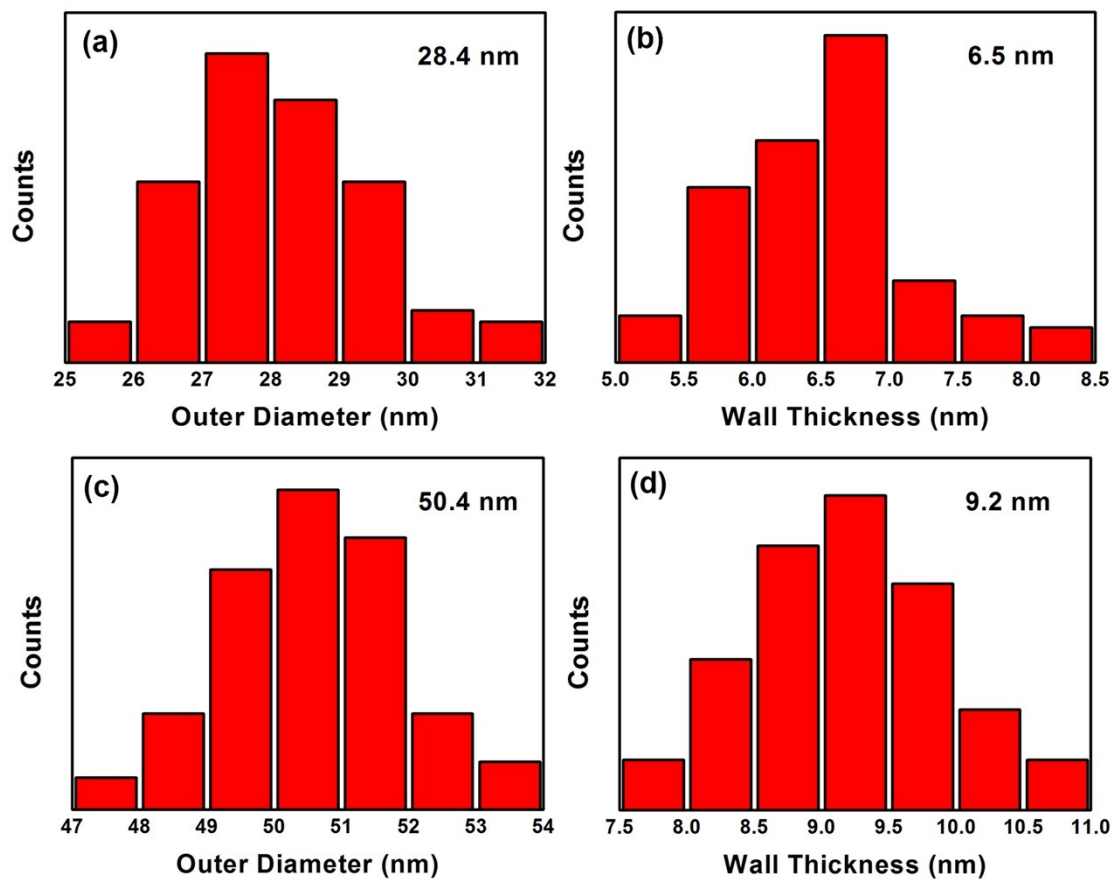

**Fig. S5** The outer diameter and wall thickness distribution of the Pd nanoplate supported Au nanorings prepared using the Pd seeds with average edge length of (a, b) 10 nm and (c, d) 18 nm.

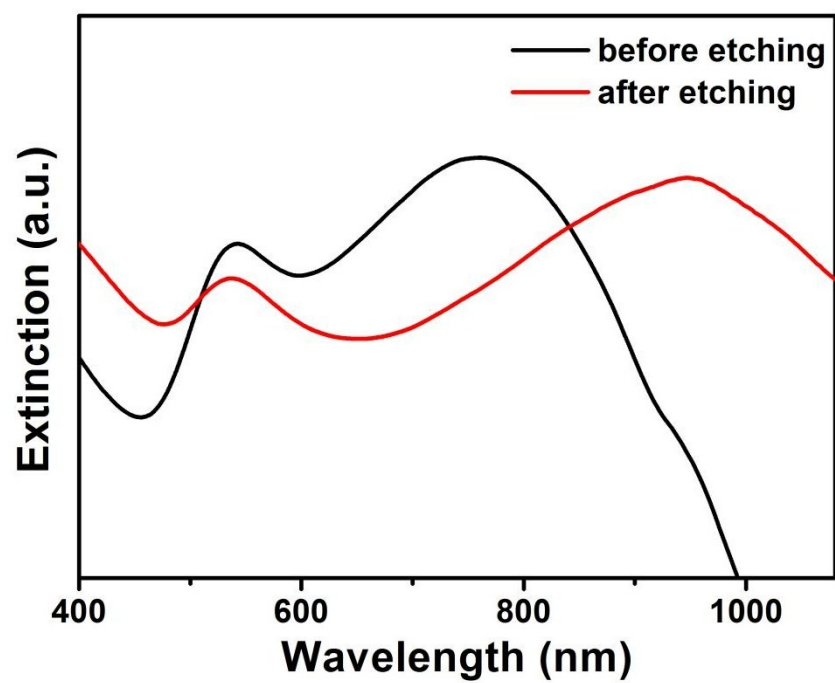

**Fig. S6** UV-vis-NIR extinction spectra of the Pd nanoplate supported Au nanorings before and after chemical etching.

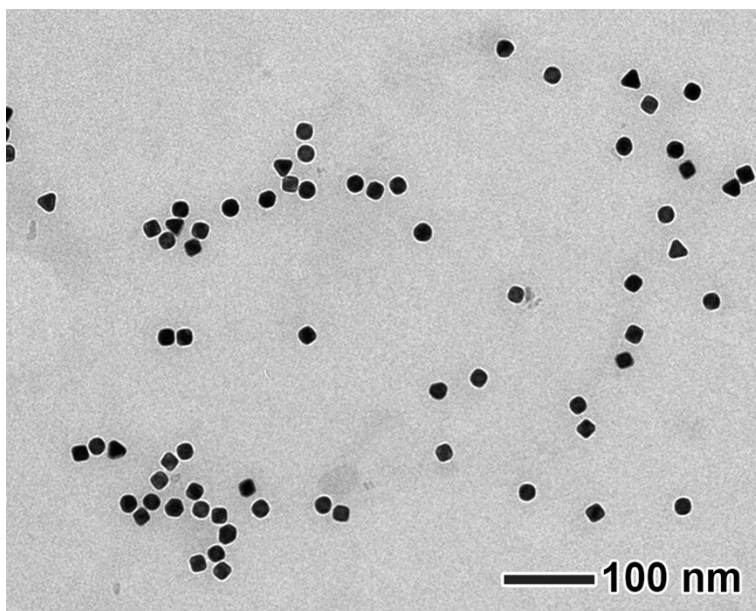

**Fig. S7** TEM image of the Au nanoparticles with *ca.* 20 nm in size.
